# Supplementary material for: How Does the Concept of Resilient City Work in Practice? Planning and Achievements
Source: MDPI journal article supplement (doi:10.3390/land10121319), 2021-12-01
Supplement: s1 [file s1]

# RC Assessment Raw Data: New York

| Clusters                   | No. | Indicators                                                                              | One NYC-A Stronger, More Resilient New York 2013 |                            | One NYC-The Plan for a Strong and Just City 2015 (RC100) |                  | New York RC Achievements |           |
|----------------------------|-----|-----------------------------------------------------------------------------------------|--------------------------------------------------|----------------------------|----------------------------------------------------------|------------------|--------------------------|-----------|
|                            |     |                                                                                         | Score                                            | Reference                  | Score                                                    | Reference        | Score                    | Reference |
| Public Participation       | 1   | Educate developers and the public about hazard mitigation                               |                                                  |                            | 2                                                        | (p225)           | 3                        | a         |
|                            | 2   | Encourage community involvement and citizen participation                               | 3                                                | (p83, 84)                  | 3                                                        | (p224)           | 2                        | b         |
|                            | 3   | Learn collectively from past urban hazards                                              |                                                  |                            |                                                          |                  |                          |           |
| Social Service             | 4   | Enforce security and laws to reduce crimes                                              |                                                  |                            |                                                          |                  |                          |           |
|                            | 5   | Set ensured human security for providing basic living needs                             | 1                                                | (p101)                     | 2                                                        | (p225, 233)      |                          |           |
|                            | 6   | Assist vulnerable neighborhoods and populations (increase social equity)                | 2                                                | (p101, p158)               | 2                                                        | (p227)           | 1                        | c         |
|                            | 7   | Enhance robust public health systems and emergency medical care                         | 3                                                | (p152-156)                 | 1                                                        | (p225)           |                          |           |
| Robust Economics           | 8   | Diversify livelihoods that can mitigate business interruption impacts                   | 1                                                | (p89)                      | 2                                                        | (p226)           | 2                        | d         |
|                            | 9   | Adopt sustainable economic initiatives                                                  | 1                                                | (p89)                      |                                                          |                  |                          |           |
|                            | 10  | Use/facilitate alternative energy (solar, wind, etc. to reduce greenhouse gas emission) | 1                                                | (p129)                     |                                                          |                  |                          |           |
| Hazard Management          | 11  | Identify, monitor, and assess hazards and vulnerability                                 | 2                                                | (p20)                      | 1                                                        | (p228)           | 2                        | e         |
|                            | 12  | Build effective emergency response services/initiatives                                 | 3                                                | (p64)                      | 1                                                        | (p240)           | 2                        | f         |
|                            | 13  | Enhance building hazard resistance by appropriate construction regulations              | 3                                                | (p68)                      | 3                                                        | (p231-232)       | 3                        | g         |
|                            | 14  | Land use and planning management for natural hazard prone areas                         | 3                                                | (p101, 129, 142, 171, 185) | 1                                                        | (p233)           | 2                        | h         |
| Institutional Optimization | 15  | Increase capacity of governmental institutions by wide collaboration                    | 3                                                | (p64, 125, 126)            | 1                                                        | (p225)           | 2                        | i         |
|                            | 16  | Adopt a flexible planning system and adaptive design process                            | 2                                                | (p64, 122, 200)            | 1                                                        | (p225)           |                          |           |
|                            | 17  | Employ agile city management for uncertainty and challenges                             |                                                  |                            |                                                          |                  | 1                        | j         |
|                            | 18  | Effective coordination with other government bodies                                     | 2                                                | (p102, 199)                | 1                                                        | (p233)           | 2                        | k         |
| Physical/Engineering       | 19  | Set robust protective infrastructure with regular maintenance                           | 3                                                | (p38, 125, 187)            | 3                                                        | (p225, 240, 244) | 3                        | l         |
|                            | 20  | Build/optimize distributed or decentralized hazard mitigation system                    | 2                                                | (p152, 172)                | 2                                                        | (p225, 240)      | 2                        | m         |

|                     |    |                                                                     |   |             |   |        |   |   |
|---------------------|----|---------------------------------------------------------------------|---|-------------|---|--------|---|---|
|                     | 21 | Enhance reliable ICT infrastructure (communication network)         | 3 | p172        |   |        |   |   |
|                     | 22 | Optimize sustainable urban form                                     |   |             |   |        |   |   |
|                     | 23 | Provide diverse, effective, affordable, sustainable transport       | 3 | (p186-188)  | 1 | (p240) | 1 | n |
| Natural Enhancement | 24 | Enhance effectively, conserve, manage, and protect ecosystems       | 2 | (p200)      |   |        | 1 | o |
|                     | 25 | Optimize urban blue-green ecological networks within compact cities | 2 | (p198, 199) | 1 | (p244) | 2 | p |
|                     | 26 | Maintain diversity in biological systems                            |   |             |   |        |   |   |

\* **Scoring Criteria:** 3 = Well elaborated /practiced; 2 = Partially included/practiced; 1 = Mentioned/practiced to a limited extent; 0 = Not mentioned or practiced at all.

### *Motivation and Related Plans before RC Plan*

With more than 520 miles of coastline and expanding flood plains in the Atlantic and Hudson Deltas, New York is always at risk of flooding. Although New York City proposed building resilient cities in 2007 in “Greener, Better New York”, not enough attention was paid to the risk, which ultimately led to the city's huge losses when Hurricane Sandy hit in 2012. The New York City government launched a series of resilience-based city-based recovery projects after the disaster, proposing "Stronger, More Resilient New York", which analyzes 10 areas based on the status quo, summarizes existing and possible risks, and proposes solutions. This was followed by guidance on reconstruction and resilience planning in the five worst-affected areas.

### *References:*

<sup>a</sup> <https://www1.nyc.gov/site/planning/index.page>

<sup>b</sup> <https://www1.nyc.gov/site/planning/index.page>

<sup>c</sup> <https://www1.nyc.gov/site/lmcr/progress/brooklyn-bridge-montgomery-coastal-resilience.page>

<sup>d</sup> <https://www1.nyc.gov/site/planning/plans/resilient-retail/resilient-retail.page>

<sup>e</sup> <https://www1.nyc.gov/site/planning/plans/resilient-neighborhoods.page>

<sup>f</sup> <https://www1.nyc.gov/site/lmcr/progress/progress.page>

<sup>g</sup> <https://www1.nyc.gov/site/planning/plans/retrofitting-buildings/retrofitting-buildings.page>

<sup>h</sup> <https://www1.nyc.gov/site/lmcr/progress/interim-flood-protection-measure.page>

<sup>i</sup> <https://www1.nyc.gov/site/lmcr/progress/progress.page>

<sup>j</sup> <https://www1.nyc.gov/site/planning/plans/retrofitting-buildings/retrofitting-buildings.page>

<sup>k</sup> <https://www1.nyc.gov/site/planning/plans/resilient-neighborhoods.page>

<sup>l</sup> (Robust infrastructure map) [nyc-oem.maps.arcgis.com](https://www1.nyc.gov/site/planning/plans/resilient-neighborhoods.page)

<sup>m</sup> (Robust infrastructure map) [nyc-oem.maps.arcgis.com](https://www1.nyc.gov/site/planning/plans/resilient-neighborhoods.page)

<sup>n</sup> (Robust infrastructure map) [nyc-oem.maps.arcgis.com](https://www1.nyc.gov/site/planning/plans/resilient-neighborhoods.page)

<sup>o</sup> <https://www1.nyc.gov/site/planning/plans/climate-resiliency/climate-resiliency.page>

<sup>p</sup> <https://www1.nyc.gov/site/lmcr/progress/battery-park-city-resilience-projects.page>
