# Supplementary material for: How Does the Concept of Resilient City Work in Practice? Planning and Achievements
Source: MDPI journal article supplement (doi:10.3390/land10121319), 2021-12-01
Supplement: s1 [file s1]

# RC Assessment Raw Data: Addis Ababa

| Clusters                   | No. | Indicators                                                                              | Addis Ababa, Enhancing Urban Resilience 2015 |           | Addis Ababa Resilience Strategy 2020 (RC100) |           | Addis Ababa RC Achievements |           |
|----------------------------|-----|-----------------------------------------------------------------------------------------|----------------------------------------------|-----------|----------------------------------------------|-----------|-----------------------------|-----------|
|                            |     |                                                                                         | Score                                        | Reference | Score                                        | Reference | Score                       | Reference |
| Public Participation       | 1   | Educate developers and the public about hazard mitigation                               | 2                                            | (p52)     | 3                                            | (p110)    | 1                           | [1]       |
|                            | 2   | Encourage community involvement and citizen participation                               | 2                                            | (p53)     | 3                                            | (p78)     | 1                           | a         |
|                            | 3   | Learn collectively from past urban hazards                                              | 2                                            | (p21)     | 1                                            | (p55)     | 2                           | b         |
| Social Service             | 4   | Enforce security and laws to reduce crimes                                              | 1                                            | (p48)     | 0                                            |           | 1                           | c         |
|                            | 5   | Set ensured human security for providing basic living needs                             | 2                                            | (p36)     | 3                                            | (p86)     | 1                           | d         |
|                            | 6   | Assist vulnerable neighborhoods and populations (increase social equity)                |                                              |           | 1                                            | (p46-47)  |                             |           |
|                            | 7   | Enhance robust public health systems and emergency medical care                         | 1                                            | (p52)     | 3                                            | (p125)    | 2                           | [1], e    |
| Robust Economics           | 8   | Diversify livelihoods that can mitigate business interruption impacts                   |                                              |           | 2                                            | (p35)     | 1                           | [1]       |
|                            | 9   | Adopt sustainable economic initiatives                                                  | 2                                            | (p39)     | 3                                            | (p73)     | 2                           | f         |
|                            | 10  | Use/facilitate alternative energy (solar, wind, etc. to reduce greenhouse gas emission) | 3                                            | (p55)     | 3                                            | (p127)    | 2                           | g         |
| Hazard Management          | 11  | Identify, monitor, and assess hazards and vulnerability                                 | 3                                            | (p44)     | 3                                            | (p100)    | 2                           | h         |
|                            | 12  | Build effective emergency response services/initiatives                                 | 3                                            | (p42)     | 3                                            | (p101)    | 2                           | i         |
|                            | 13  | Enhance building hazard resistance by appropriate construction regulations              | 1                                            | (p20)     | 3                                            | (p90)     |                             |           |
|                            | 14  | Land use and planning management for natural hazard prone areas                         | 2                                            | (p79)     | 1                                            | (p44)     | 0                           | [2,3]     |
| Institutional Optimization | 15  | Increase capacity of governmental institutions by wide collaboration                    | 2                                            | (p20)     | 2                                            | (p101)    | 2                           | j         |
|                            | 16  | Adopt a flexible planning system and adaptive design process                            | 1                                            | (p39)     | 1                                            | (p141)    | 0                           | [4,5]     |
|                            | 17  | Employ agile city management for uncertainty and challenges                             | 1                                            | (p14)     | 1                                            | (p79)     | 1                           | k         |
|                            | 18  | Effective coordination with other government bodies                                     | 2                                            | (p20)     | 2                                            | (p103)    | 2                           | l         |
| Physical/Engineering       | 19  | Set robust protective infrastructure with regular maintenance                           | 2                                            | (p15)     | 2                                            | (p125)    | 2                           | m         |
|                            | 20  | Build/optimize distributed or decentralized hazard mitigation system                    |                                              |           |                                              |           |                             |           |
|                            | 21  | Enhance reliable ICT infrastructure (communication network)                             |                                              |           | 3                                            | (p68)     | 2                           | n         |

|                        |    |                                                                     |   |          |   |        |   |     |
|------------------------|----|---------------------------------------------------------------------|---|----------|---|--------|---|-----|
| Natural<br>Enhancement | 22 | Optimize sustainable urban form                                     |   |          | 2 | (p141) | 2 | [2] |
|                        | 23 | Provide diverse, effective, affordable, sustainable transport       | 3 | (p64-69) | 3 | (p94)  | 3 | o   |
|                        | 24 | Enhance effectively, conserve, manage, and protect ecosystems       | 1 | (p71)    | 3 | (p118) | 2 | p   |
|                        | 25 | Optimize urban blue-green ecological networks within compact cities |   |          | 2 | (p122) | 2 | q   |
|                        | 26 | Maintain diversity in biological systems                            |   |          | 2 | (p136) |   |     |

\* **Scoring Criteria:** 3 = Well elaborated /practiced; 2 = Partially included/practiced; 1 = Mentioned/practiced to a limited extent; 0 = Not mentioned or practiced at all.

### *Motivation and Related Plans before RC Plan*

The experience of 30 years' ethnic federalism seems to be more of a problem than a solution for deep routed socio-political conflicts. Land governance, within this ethnic federalism, is exacerbating sociopolitical conflicts [6]. It has made dealing with trans-regional boundary issues such as urbanization, environmental protection (water and green resources), and in general socio-spatial developments in peri-urban areas difficult. The AAOSIDP (Addis Ababa and the Surrounding Oromia Integrated Development Plan) and NUDSP (National Urban Development Spatial Plan) were launched aiming to bridge the gaps in managing cross-boundary issues. Yet, AAOSIDP had evoked strong opposition, which led to mass protests first in the Oromia region and later triggered the tensions among the government and wider population all over the country. First, AAOSIDP was officially disapproved by the Oromia Regional Government (<https://www.bbc.com/news/worldafrica-35325536>). Following that, NUDSP failed to get approved by the parliament (<https://www.bbc.com/news/worldafrica-35300471>).

In the new structure plan (2016) much less than earlier – 14,276 ha are designated green spaces but the word 'ecosystem service provision' has for the first time found its way into the plan. For instance, 'Multifunctional Forests' is listed to rehabilitate the upper catchment of Addis Ababa and thereby reduce flooding problems downstream as well as provide other ESS such as food production and biodiversity conservation. A 30 m buffer zone on each side of rivers should secure green recreational areas near households in addition to reducing pollution. The proposed green areas are today in most cases agricultural or settled areas [4].

Moreover, when we established the Resilience Project Office, Mayor Diriba Kuma put forward an ambitious agenda to make Addis a resilient city in five years' time. We want the city to be a model for the region. Addis has already been a leader in promoting climate resilience and green economy, and holds a track record of championing resilient initiatives such as a light rail system, proper sewage waste plant, solid waste management, and affordable housing. Addis has already started its resilience journey, so it is really a matter of working with stakeholders and community members to connect the dots [7].

### *References:*

1. RC100. Addis Ababa Resilience Strategy. Available online: <https://resilientcitiesnetwork.org/networks/addis-ababa/> (accessed on 15 March 2021).
2. Herslund, L.; Backhaus, A.; Fryd, O.; Jørgensen, G.; Jensen, M.B.; Limbumba, T.M.; Liu, L.; Mguni, P.; Mkupasi, M.; Workalemahu, L.; et al. Conditions and opportunities for green infrastructure – Aiming for green, water-resilient cities in Addis Ababa and Dar es Salaam. *Landscape and Urban Planning* **2018**, *180*, 319-327, doi:<https://doi.org/10.1016/j.landurbplan.2016.10.008>.
3. Birhanu, D.; Kim, H.; Jang, C.; Park, S. Flood Risk and Vulnerability of Addis Ababa City Due to Climate Change and Urbanization. *Procedia Engineering* **2016**, *154*, 696-702, doi:<https://doi.org/10.1016/j.proeng.2016.07.571>.
4. Mohamed, A.; Worku, H.; Lika, T. Urban and regional planning approaches for sustainable governance: The case of Addis Ababa and the surrounding area changing landscape. *City and Environment Interactions* **2020**, *8*, 100050, doi:<https://doi.org/10.1016/j.cacint.2020.100050>.
5. Alem, G.J.S. Urban Plans and Conflicting Interests in Sustainable Cross-Boundary Land Governance, the Case of National Urban and Regional Plans in Ethiopia. *Sustainability* **2021**, *13*, 3081.
6. Lavers, T.J.A.A. Responding to land-based conflict in Ethiopia: The land rights of ethnic minorities under federalism. **2018**, *117*, 462-484.
7. A Milestone in Addis Ababa's Resilience Journey. Available online: <https://medium.com/@100ResilientCities/a-milestone-in-addis-ababas-resilience-journey-8c70a8e15e83> (accessed on

- 
- <sup>a</sup> <https://resilientaddis.org/2018/11/05/014/>
- <sup>b</sup> <https://resilientaddis.org/2018/11/29/030/>
- <sup>c</sup> <https://newbusinessethiopia.com/tag/addis-ababa-police-commission/>
- <sup>d</sup> <https://resilientaddis.org/2018/12/04/033/>
- <sup>e</sup> <https://www.etpha.org/basic-facts/projects-and-activities.html>
- <sup>f</sup> Addis Ababa Action Agenda on Financing for Development: [https://sustainabledevelopment.un.org/content/documents/2051AAAA\\_Outcome.pdf](https://sustainabledevelopment.un.org/content/documents/2051AAAA_Outcome.pdf)
- <sup>g</sup> <https://resilientaddis.org/2019/03/26/132/>
- <sup>h</sup> <https://resilientaddis.org/2021/06/14/addis-ababa-city-has-finalized-water-fund-feasibility-assessment-study/>
- <sup>i</sup> <https://resilientaddis.org/2018/12/31/049/>
- <sup>j</sup> <https://medium.com/@100ResilientCities/a-milestone-in-addis-ababas-resilience-journey-8c70a8e15e83>
- <sup>k</sup> <https://resilientaddis.org/2018/11/08/024/>
- <sup>l</sup> <https://medium.com/@100ResilientCities/a-milestone-in-addis-ababas-resilience-journey-8c70a8e15e83>
- <sup>m</sup> <https://resilientaddis.org/2018/11/21/027/>
- <sup>n</sup> <https://resilientaddis.org/2018/12/31/049/>
- <sup>o</sup> <https://resilientaddis.org/2019/02/07/69-2/>
- <sup>p</sup> <https://resilientaddis.org/2019/03/26/130/>
- <sup>q</sup> <https://resilientaddis.org/2018/10/09/011/>
